# Supplementary material
Source: PubMed Central journal article supplement (PMC5765440)
Supplement: NIHMS929836-supplement-Supp_TableS1.pdf [file NIHMS929836-supplement-Supp_TableS1.pdf]

**Supplemental Table. IC50 of monotherapy**

|           | MGG<br>line | oHSV (MOI)   |       | TGF- $\beta$ inhibitor ( $\mu$ M) |               |                   | TMZ<br>( $\mu$ M) |
|-----------|-------------|--------------|-------|-----------------------------------|---------------|-------------------|-------------------|
|           |             | G47 $\Delta$ | MG18L | SB43154<br>2                      | LY210976<br>1 | galunisertib<br>9 |                   |
| Primary   | 4           | 0.43         | 0.042 | 30                                | 60            | 70                | 34                |
|           | 8           | 0.22         | 0.08  | 34                                | 17            | 55                | 1.9               |
|           | 64          | 2.6          | 0.052 | 55                                | n.d.          | n.d.              | 890               |
| Recurrent | 24R         | 4.1          | 4     | 51                                | 50            | >240              | 660               |
|           | 31          | 1.8          | 0.19  | 130                               | >240          | 180               | 490               |
|           | 45          | 4.1          | 0.11  | 124                               | 140           | 150               | 430               |
|           | 50          | 0.008        | 0.01  | 3.6                               | 21            | 140               | 670               |
|           | 85          | 2.9          | 1.1   | 92                                | 230           | >240              | 410               |
|           | 91          | 0.81         | 0.029 | 59                                | >240          | >240              | 140               |
|           | 111R        | 0.72         | 0.12  | 43                                | 120           | >240              | 480               |
|           | 123         | 0.21         | 0.11  | 85                                | 170           | 160               | >1000             |

Mean from 3 independent experiments is shown. n.d., not done.
